# Supplementary material for: Highly Dispersed Nickel Nanoparticles on Hierarchically Ordered Macroporous Al2O3 and Its Catalytic Performance for Steam Reforming of 1-Methyl Naphthalene
Source: MDPI journal article supplement (doi:10.3390/catal12121542), 2022-11-30
Supplement: s1 [file s1]

*Supplementary Materials*

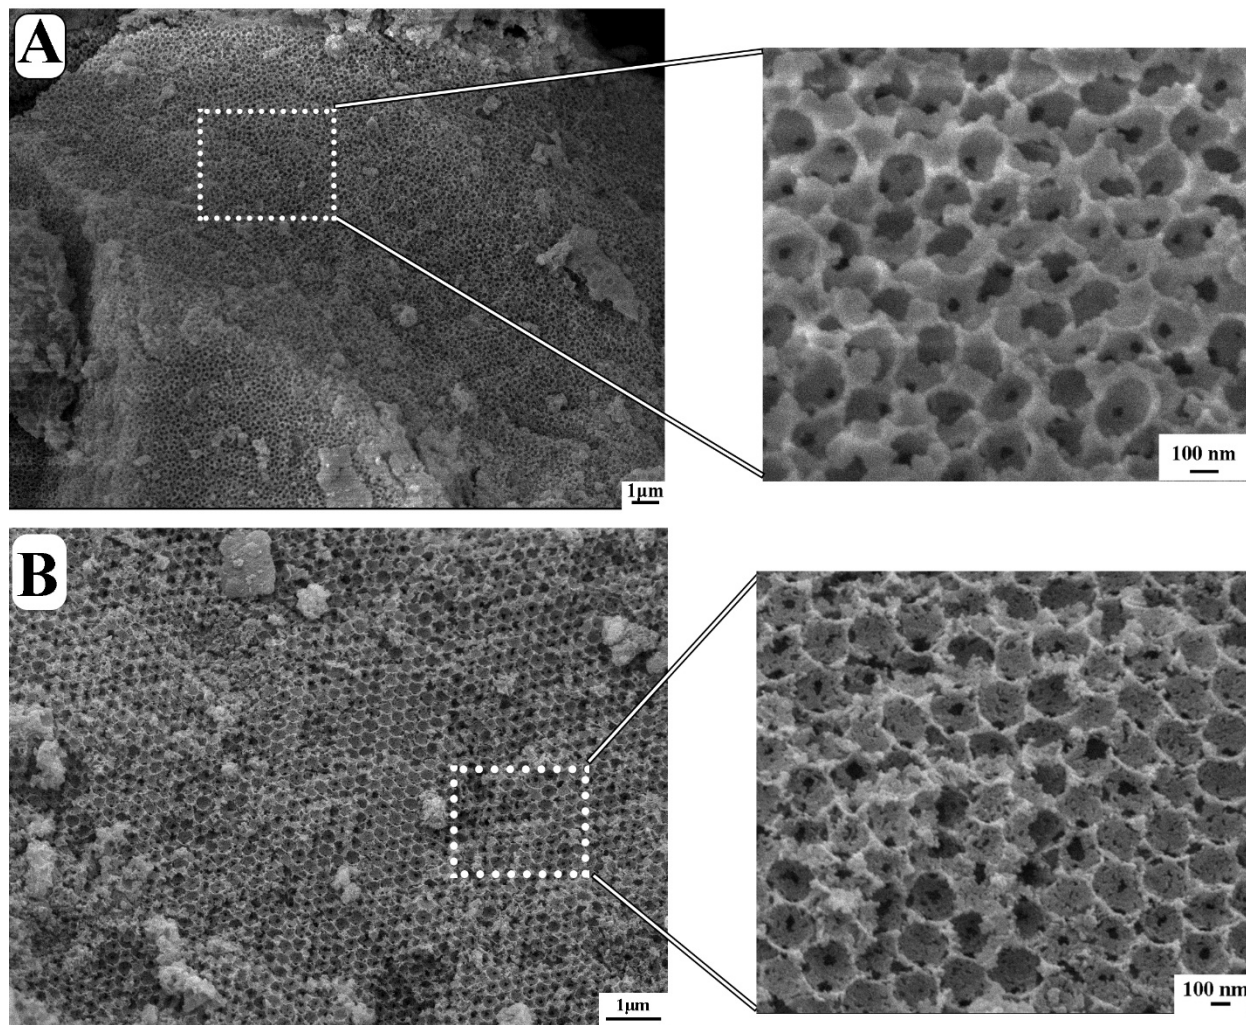

**Figure S1.** The SEM images of (A) Ni-MaAl and (B) 2K/Ni-MaAl.

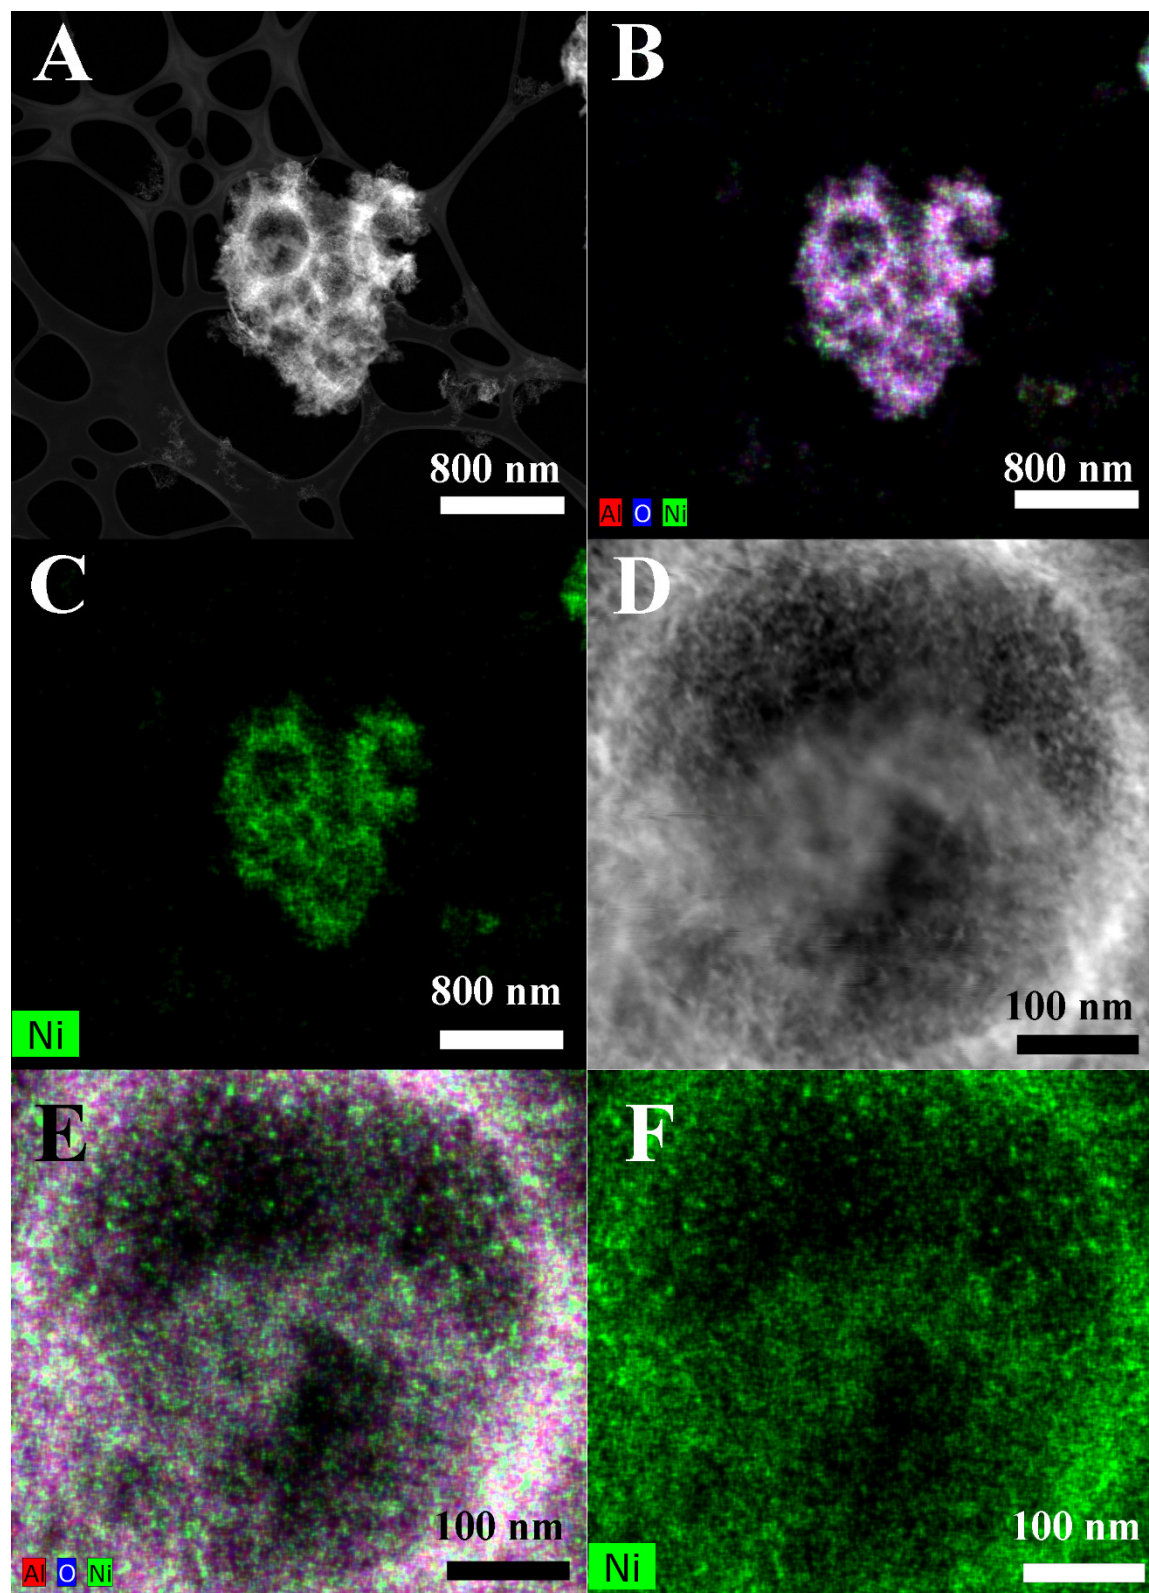

**Figure S2.** (A,D) the TEM images and (B,C,E,F) TEM-EDS mapping of Ni-MaAl.

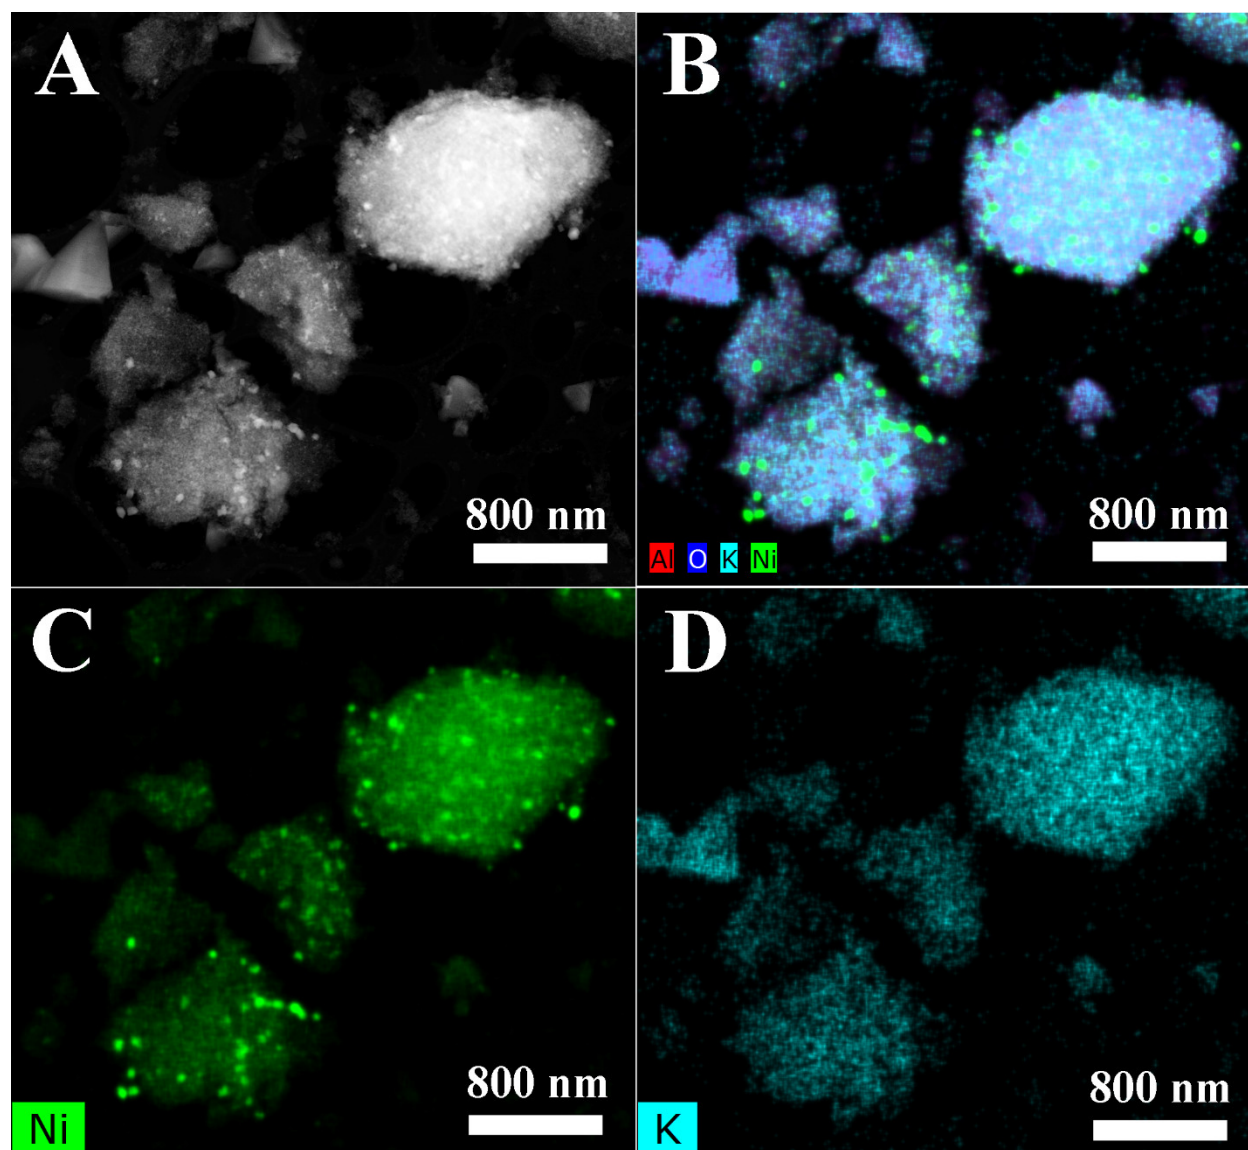

**Figure S3.** (A) the TEM image and (B,C,D) TEM-EDS mapping of 0.5K/Ni-MeAl.



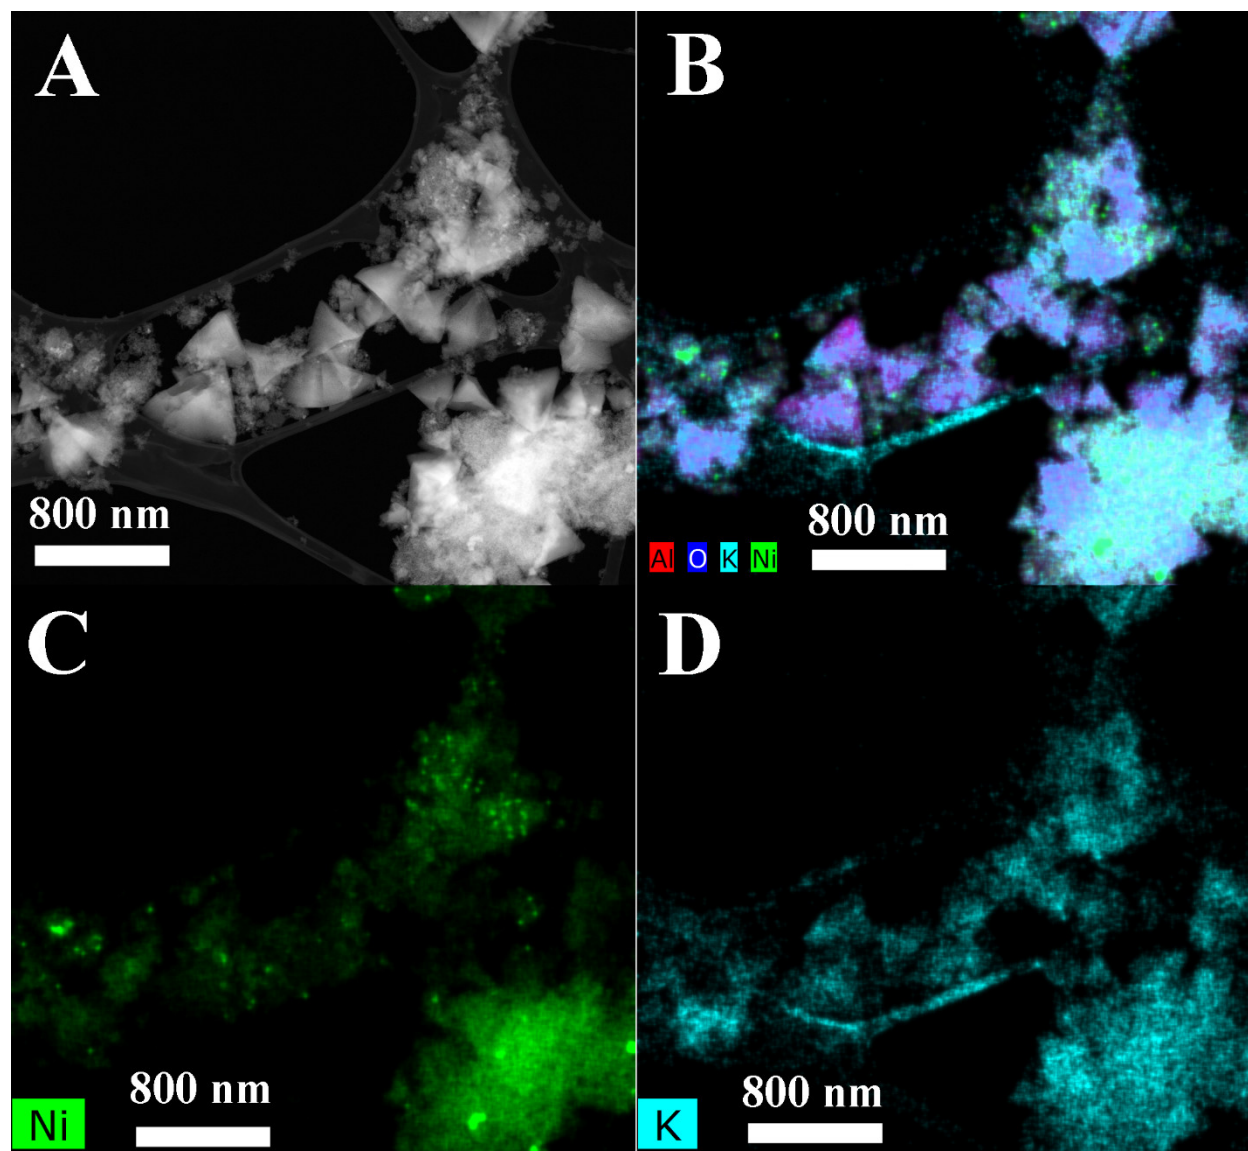

**Figure S4.** (A) the TEM image and (B,C,D) TEM-EDS mapping of 2K/Ni-MeAl..

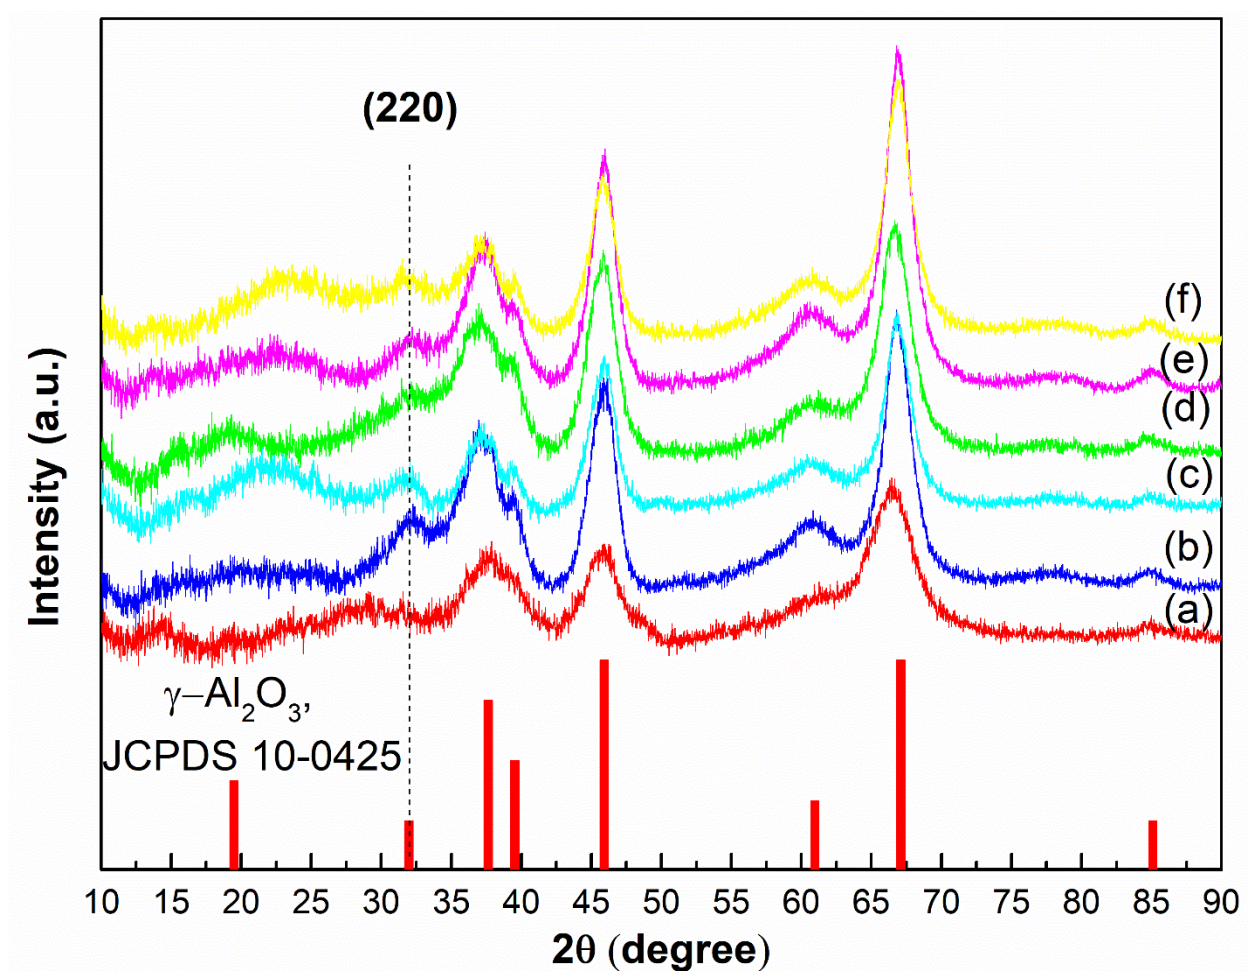

**Figure S5.** XRD patterns of (a) MeAl, (b) 2K/MeAl, (c) 5K/MeAl, (d) MaAl, (e) 2K/MaAl, and (f) 5K/MaAl.

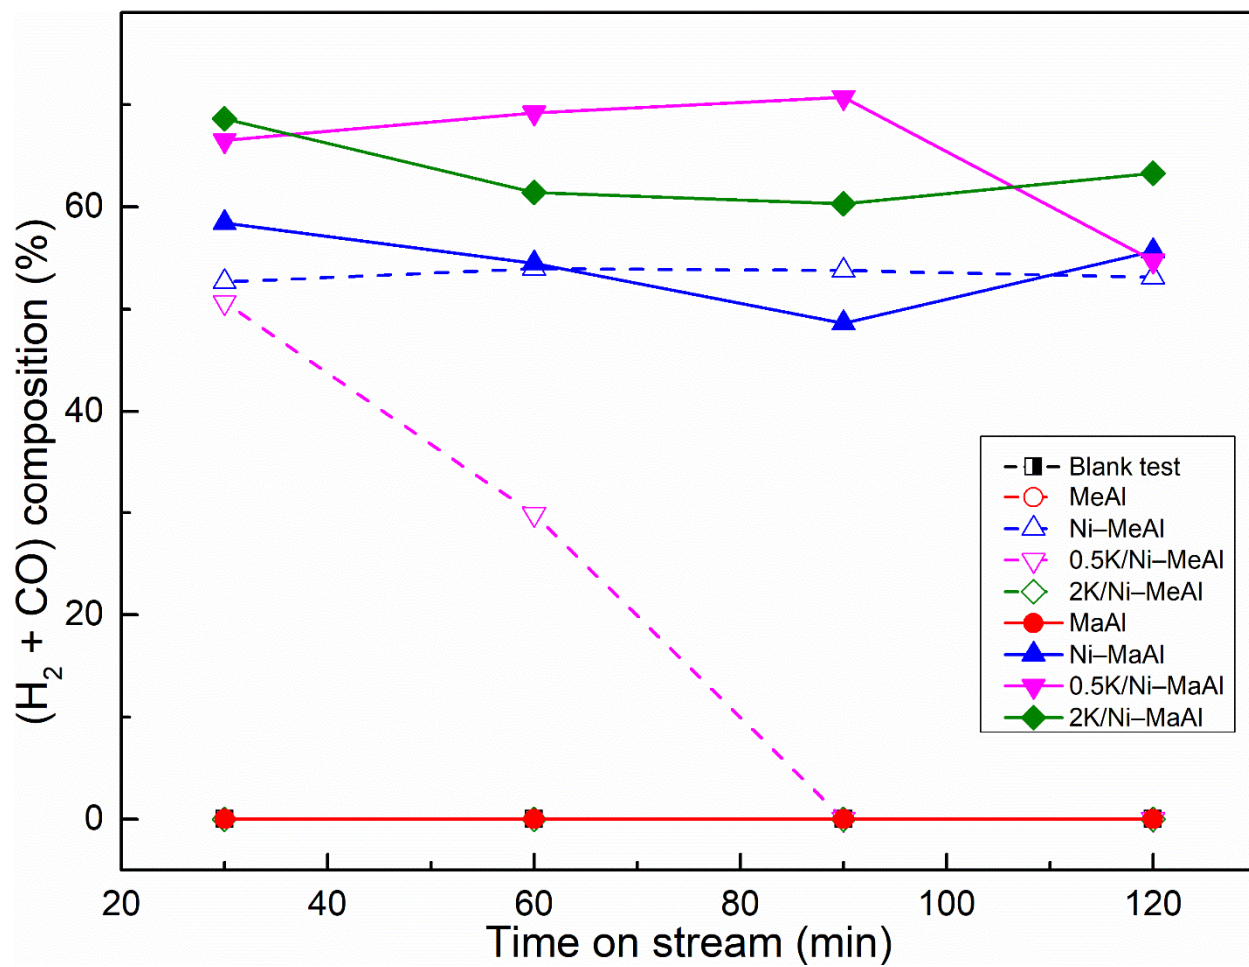

**Figure S6.** Time on the stream of total H<sub>2</sub> and CO composition in gas products. The values of the (H<sub>2</sub> + CO) composition from Blank test and the reactions over MeAl, 2K/Ni-MeAl, MaAl are zero and not clearly shown in the graph.



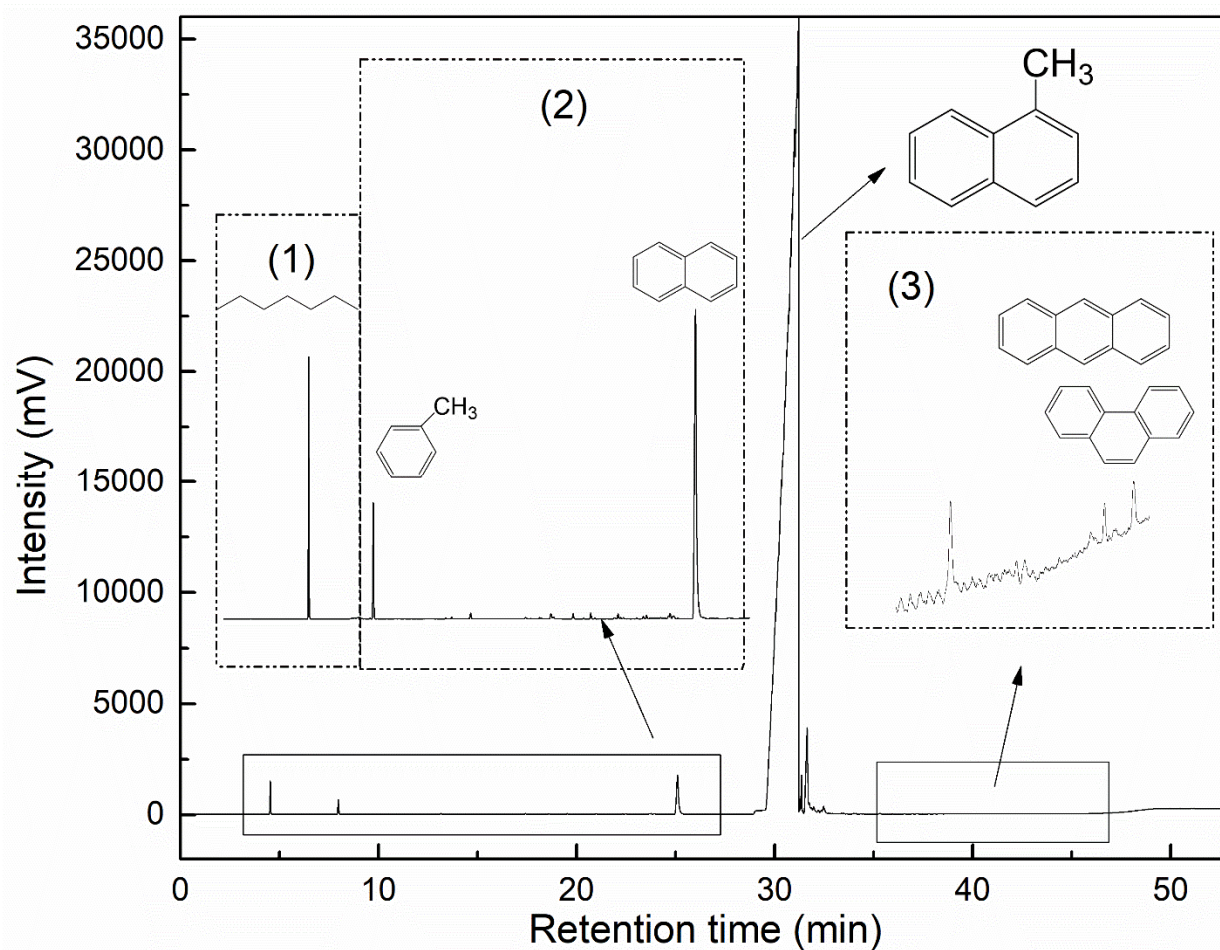

**Figure S7.** A typical gas chromatogram of liquid products (reaction conditions: Ni-MeAl catalyst,  $T = 600\text{ }^{\circ}\text{C}$ ,  $t = 2\text{ h}$ , mass of catalyst = 0.25g,  $F_{1\text{-methylnaphthalene}} = 0.14\text{ ml/min}$ ): (1) ring-Opened products, (2) aromatics, and (3) condensed products or polymerizates.

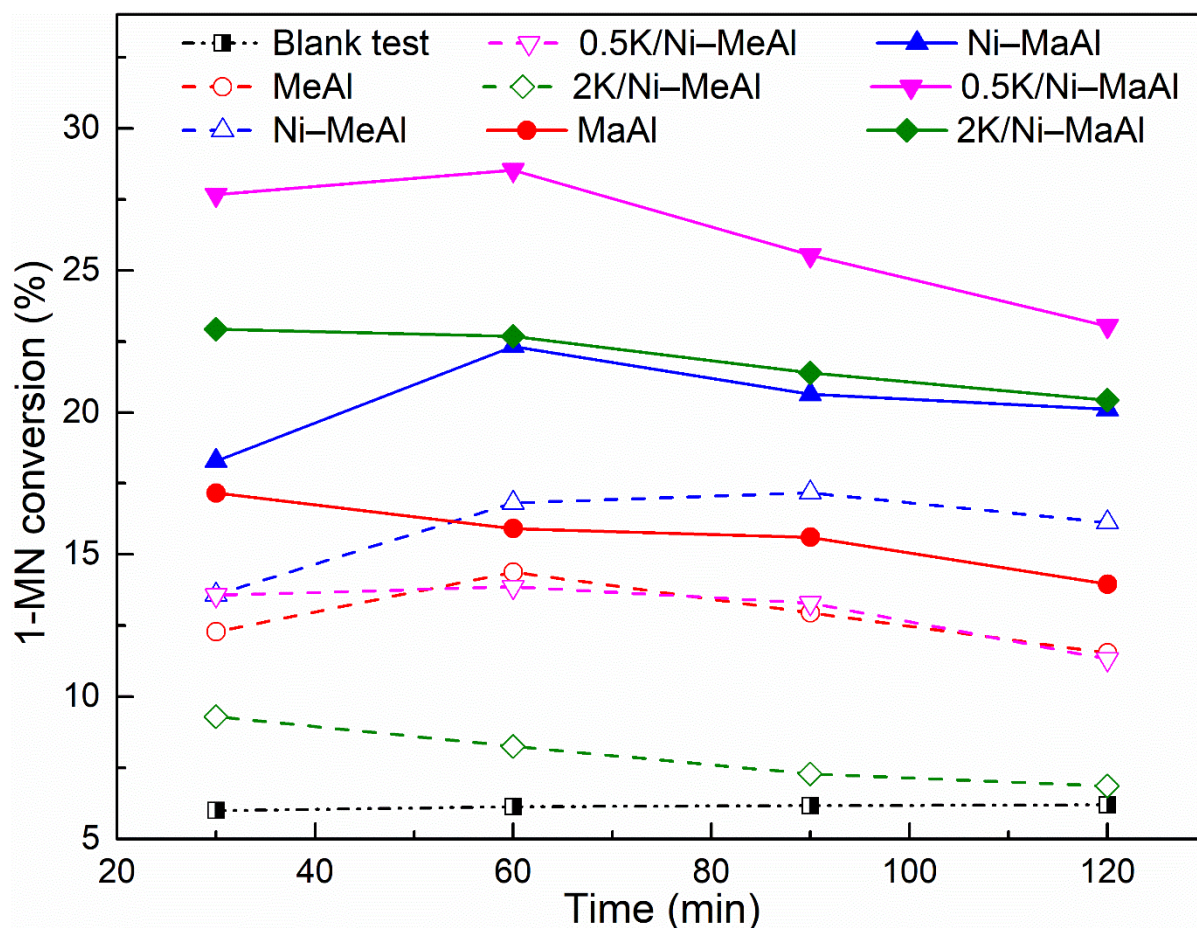

**Figure S8.** Time on the stream of 1-MN conversions for all catalysts.
